# Supplementary material
Source: PubMed Central journal article supplement (PMC3831622)

## Supplementary Figure 2

GAPDH activity and autophagy are increased and decreased in embryos exposed to rapamycin and 3-methyladenosine (3-MA), respectively. (A) Blastocysts were incubated for 30 hours in either DMSO vehicle control (n=15) vs. 5 $\mu$ M rapamycin (n=15). GAPDH activity was significantly higher in rapamycin treated blastocysts ( $p<0.05$ ). (B) Blastocysts were incubated for 30 hours in control media (n=15), 4 $\mu$ M 3-MA (n=15) or 8 $\mu$ M 3-MA (n=14). GAPDH activity was negatively affected in a dose dependent fashion. (\* $p<0.001$ ; \*\* $p<0.001$ ).

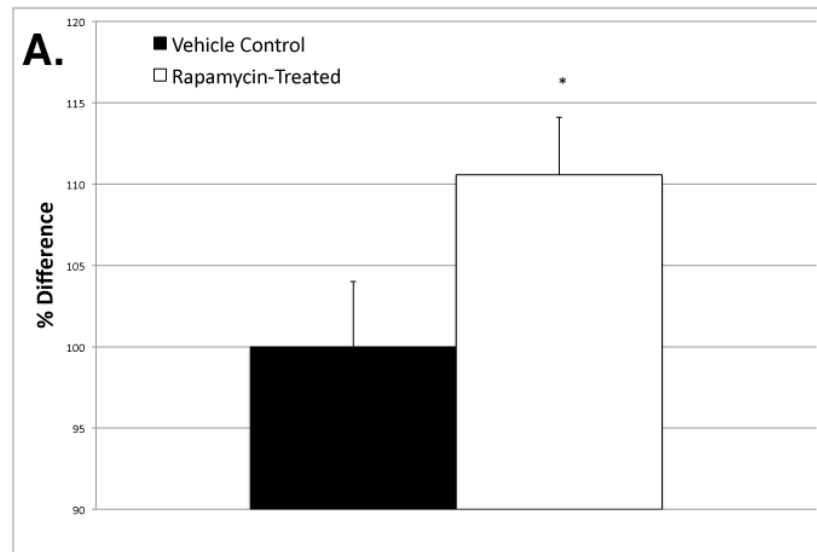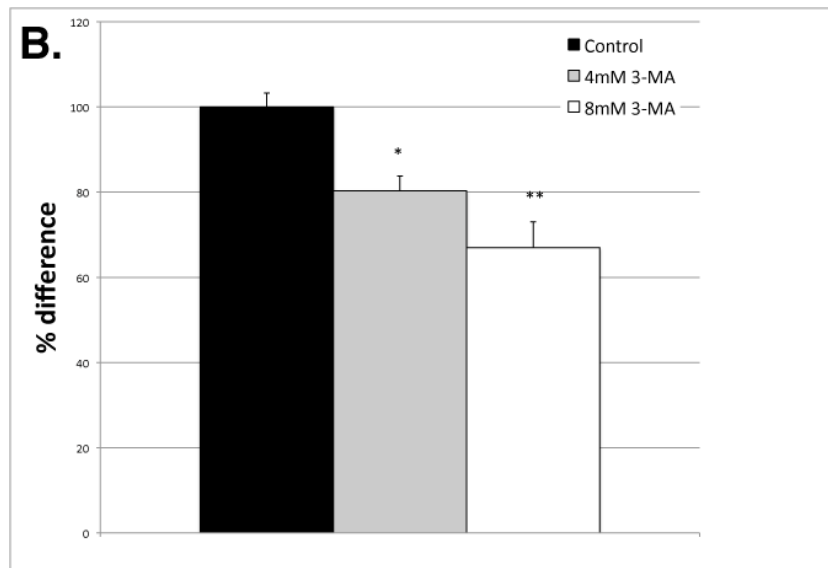

Supplement: NIHMS354240-supplement-Supp_2.pdf [file NIHMS354240-supplement-Supp_2.pdf]
